# Supplementary material
Source: Royal Society of Chemistry journal article supplement (doi:10.1039/d6tb00312e)
Supplement: d6tb00312e1.pdf [file d6tb00312e1.pdf]

## Supporting Information

# Thiol-Ene Click Chemistry-Mediated Space-Maintaining Janus Collagen Membrane for GBR with Antibacterial, Immunomodulatory, and Proangiogenic Functions

Jiahao Zhu<sup>a,b,c,d</sup>, Zhongke Ji<sup>a,b,c,d</sup>, Xinyu Feng<sup>a,b,c,d</sup>, Baihui Miao<sup>a,b,c,d</sup>, Yanqing Zhang<sup>a,b,c,d</sup>, He Wang<sup>a,b,c,d</sup>, Cong Yang<sup>a,b,c,d</sup>, Chuan Ma<sup>a,b,c,d\*</sup>, Xiaoguang Li<sup>e\*</sup>

<sup>a</sup> Department of Oral and Maxillofacial Surgery, School and Hospital of Stomatology, Cheeloo College of Medicine, Shandong University, Ji'nan, 250012, China.

<sup>b</sup> Shandong Key Laboratory of Oral Tissue Regeneration, Ji'nan, 250012, China.

<sup>c</sup> Shandong Engineering Research Center of Dental Materials and Oral Tissue Regeneration, Ji'nan, 250012, China.

<sup>d</sup> Shandong Provincial Clinical Research Center for Oral Diseases, Ji'nan, 250012, China.

<sup>e</sup> Department of Stomatology, Shandong Provincial Hospital Affiliated to Shandong First Medical University, Ji'nan, 250021, China.

\* Corresponding authors.

## Supplementary Figures

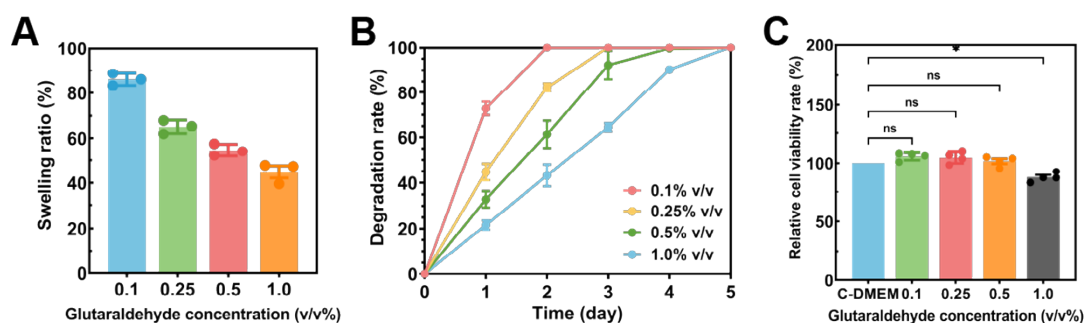

**Fig. S1.** (A) Water swelling ratio of dried CM crosslinked with different glutaraldehyde concentrations after immersion in PBS for 24 h (n=3 per group). (B) Short-term degradation behavior of CM crosslinked with different glutaraldehyde concentrations in 10 U/mL type I collagenase solution (n=3 per group). (C) CCK-8 results for relative cytotoxicity of L929 cells exposed to 48 h extracts of CM (1.5 mg/mL) crosslinked with different glutaraldehyde concentrations. DMEM complete medium was set as the 100% control group (n=4 per group).

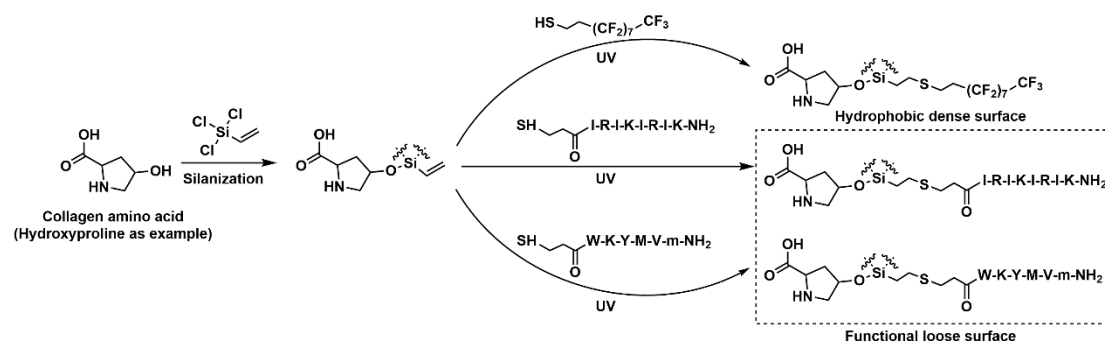

**Fig. S2.** The schematic diagrams of silanization and thiol-ene click reactions.

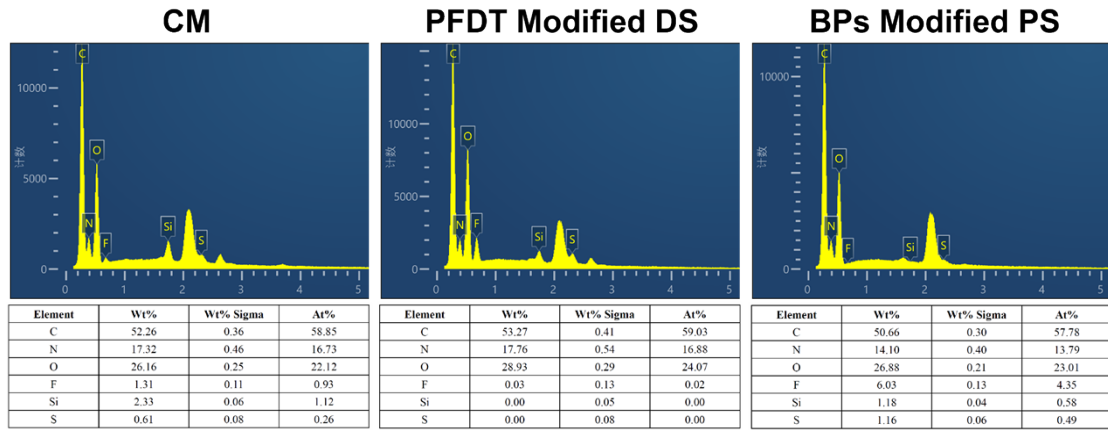

Fig. S3. EDS elemental composition, weight percentage (Wt%), and atomic percentage (At%) for both sides of CM and HAA-JM.

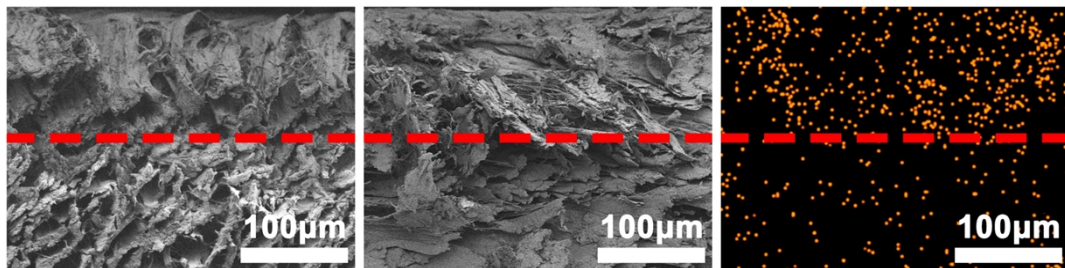

Fig. S4. Micrographs of the Janus boundary and spatial distribution of representative asymmetric elements (F as example) for CM and HAA-JM.

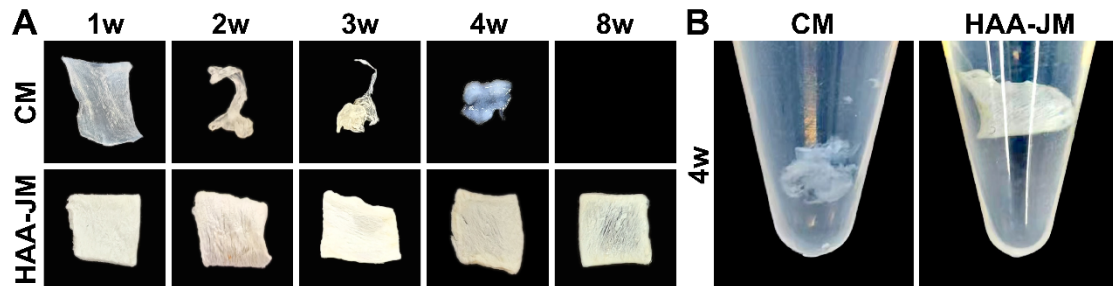

Fig. S5. (A) Comparison of macroscopic images of CM and HAA-JM in collagenase solution after drying (except CM in 4w) in the degradation experiment. (B) Physical states of CM and HAA-JM immersed in PBS at 4 weeks.

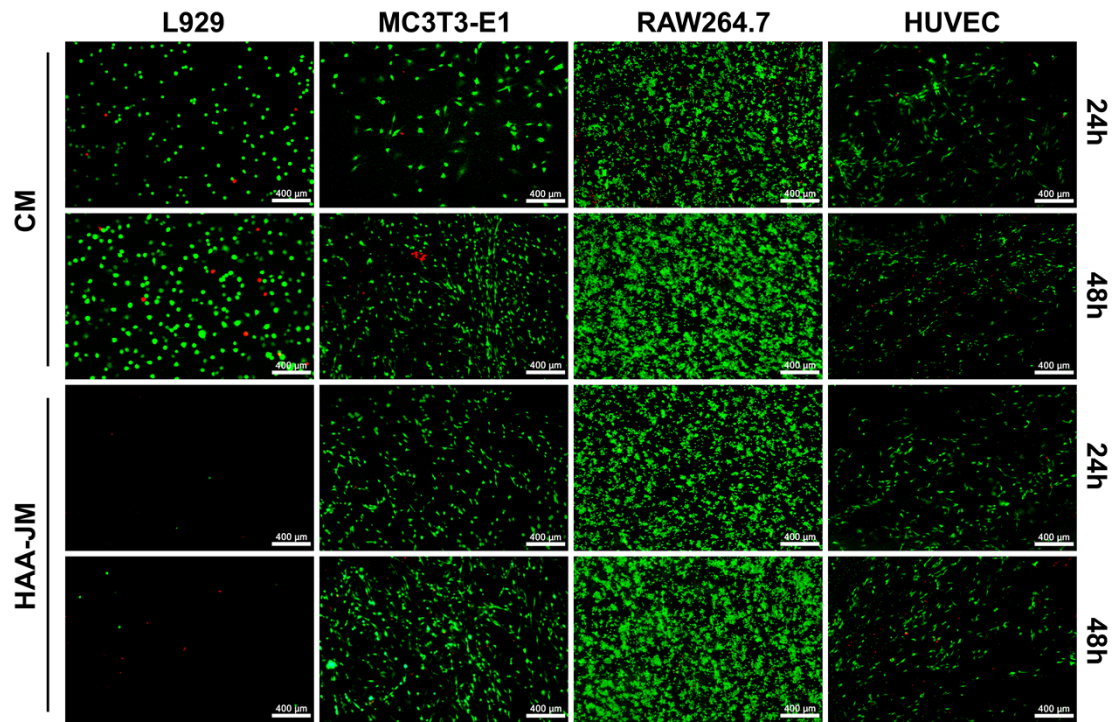

**Fig. S6.** Live/dead fluorescent images of L929, MC3T3-E1, RAW264.7 and HUVEC cells seeded on the surfaces of CM and HAA-JM membranes after 24h and 48h of culture. L929 cells were seeded on the dense side, while the other cell types were seeded on the porous side. Scale bar: 400 μm. n=3 per group at each time point.

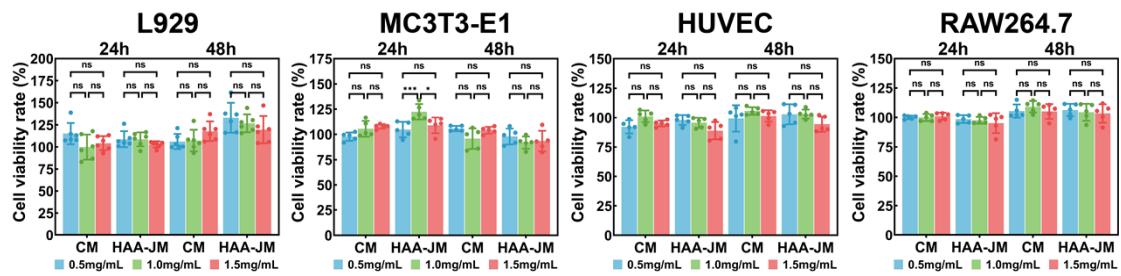

**Fig. S7.** CCK-8 cell viability assay results of L929, MC3T3-E1, RAW264.7 and HUVEC cells cultured for 24h and 48h in the extraction media of CM and HAA-JM at different concentrations. Data are presented as the mean values (n=5 per group).

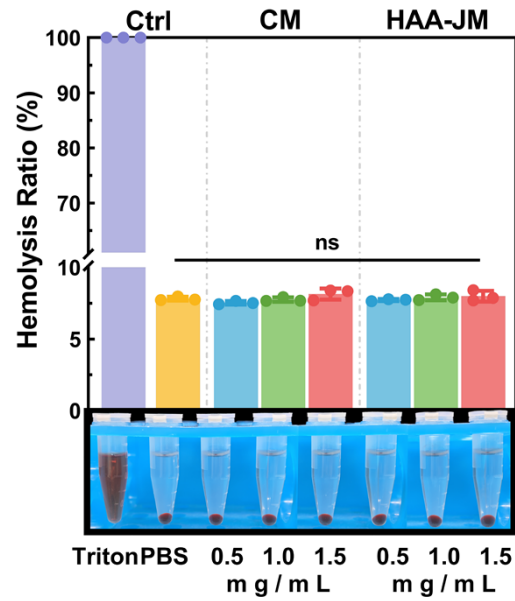

**Fig. S8.** Hemolysis rates of PBS extracts of CM and HAA-JM at different concentrations, and corresponding photographic images of each group in the hemolysis test. Data are presented as the mean values (n=3 per group, ns indicates no statistically significant difference).

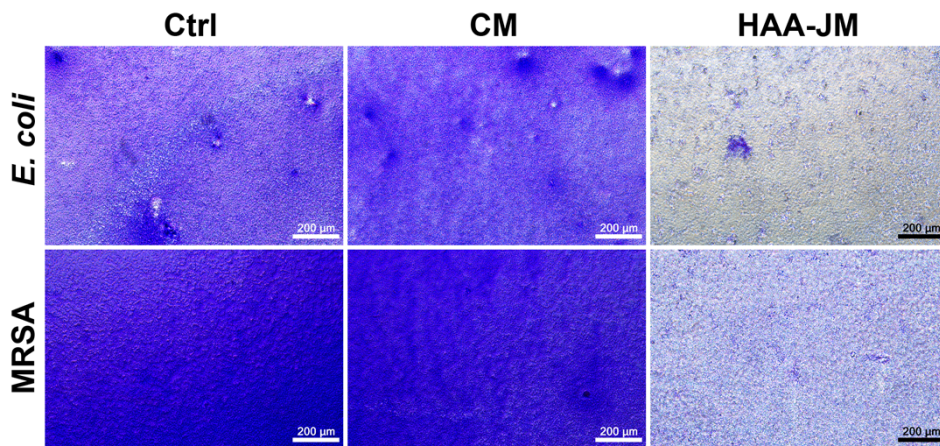

**Fig. S9.** Microscopic images of *E. coli* and MRSA biofilms stained with crystal violet after co-culture with BHI broth extracts of different groups. Scale bar: 200  $\mu\text{m}$ .

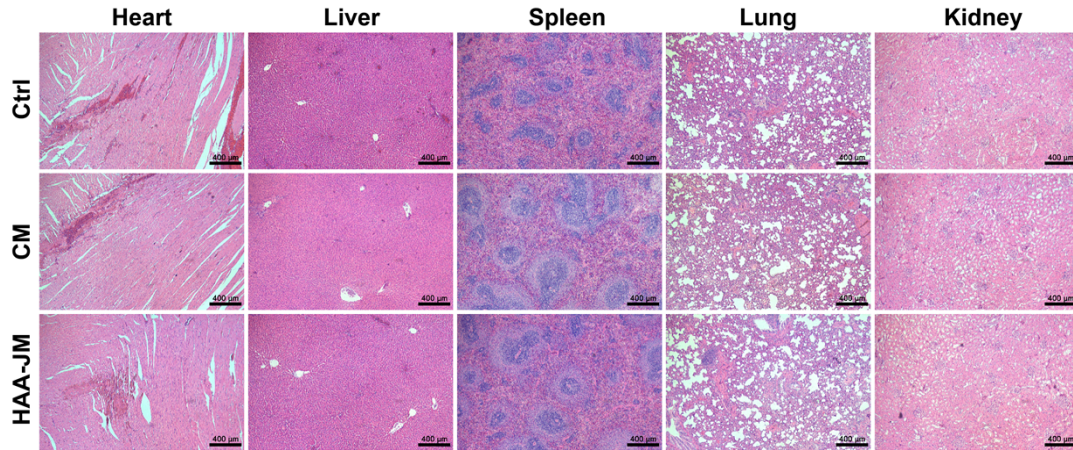

Fig. S10. HE staining images of major organs of rats in each group after the in vivo experiment. Scale bar: 400  $\mu\text{m}$ .

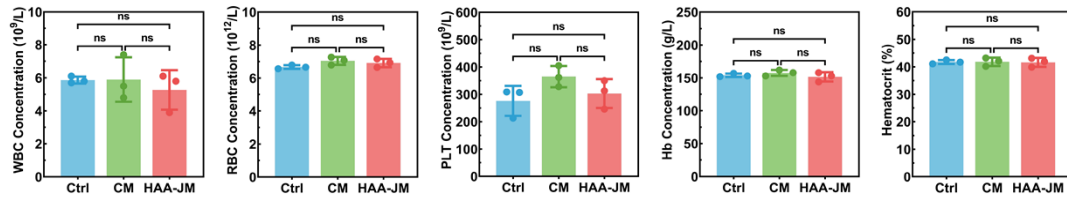

Fig. S11. Quantitative analyses of main hematological parameters (WBC, RBC, PLT, Hb and HCT) of rats. Data are presented as mean values ( $n=3$  per group, ns indicates no significant statistical difference).

### Supplementary Table

| Parameters                             | Ctrl  | CM     | HAA-JM | References |
|----------------------------------------|-------|--------|--------|------------|
| White Blood Cells ( $10^9/\text{L}$ )  | 5.87  | 5.9    | 5.27   | 5~15       |
| Red Blood Cells ( $10^{12}/\text{L}$ ) | 6.67  | 7.05   | 6.92   | 5~12       |
| Platelets ( $10^9/\text{L}$ )          | 571   | 609    | 627    | 500~1200   |
| Hemoglobin (g/L)                       | 154   | 157.67 | 151.67 | 111~180    |
| Hematocrit (%)                         | 41.77 | 41.83  | 41.63  | 36~59      |

Table S1. Detection data of main indicators in rat routine blood tests (WBC, RBC, PLT, Hb, HCT). Data are presented as mean values ( $n=3$  per group).
